# Supplementary material for: Proposal of an Adaptive Neurofuzzy System to Control Flow Power in Distributed Generation Systems
Source: Hindawi journal article supplement (doi:10.1155/2019/1610898), 2019-01-01
Supplement: f1 [file 1610898.f1.zip]

Archive with 20 entries (16 files):
- 1610898.f1/
- 1610898.f1/Data Results/
- 1610898.f1/Data Results/Results 1 Generator/
- 1610898.f1/Data Results/Results 1 Generator/ResultsCS1AD0.mat
- 1610898.f1/Data Results/Results 1 Generator/ResultsCS1AD1.mat
- 1610898.f1/Data Results/Results 1 Generator/ResultsCS2AD0.mat
- 1610898.f1/Data Results/Results 1 Generator/ResultsCS2AD1.mat
- 1610898.f1/Data Results/Results 1 Generator/ResultsCS3AD0.mat
- 1610898.f1/Data Results/Results 1 Generator/ResultsCS3AD1.mat
- 1610898.f1/Data Results/Results 1 Generator/ResultsCS4AD0.mat
- 1610898.f1/Data Results/Results 1 Generator/ResultsCS4AD1.mat
- 1610898.f1/Data Results/Results 3 Generators/
- 1610898.f1/Data Results/Results 3 Generators/ResultsCS1AD0.mat
- 1610898.f1/Data Results/Results 3 Generators/ResultsCS1AD1.mat
- 1610898.f1/Data Results/Results 3 Generators/ResultsCS2AD0.mat
- 1610898.f1/Data Results/Results 3 Generators/ResultsCS2AD1.mat
- 1610898.f1/Data Results/Results 3 Generators/ResultsCS3AD0.mat
- 1610898.f1/Data Results/Results 3 Generators/ResultsCS3AD1.mat
- 1610898.f1/Data Results/Results 3 Generators/ResultsCS4AD0.mat
- 1610898.f1/Data Results/Results 3 Generators/ResultsCS4AD1.mat
